# Supplementary material
Source: PubMed Central journal article supplement (PMC5527410)
Supplement: JCM.00193-17_zjm999095523s1.pdf [file JCM.00193-17_zjm999095523s1.pdf]

Table S1. Relevant genotypically-defined characteristics and broth microdilution carbapenem minimum inhibitory concentrations for bacterial isolates tested in study stages 1 and 2

| Isolate Number                       | Isolate Source | Organism           | NCBI GenBank Sequence Accession Number | Key Known Resistance Determinants | Carbapenem MIC ( $\mu\text{g/ml}$ ) |     |     |     | Study Stage(s) in which Isolate was Included |
|--------------------------------------|----------------|--------------------|----------------------------------------|-----------------------------------|-------------------------------------|-----|-----|-----|----------------------------------------------|
|                                      |                |                    |                                        |                                   | ETP                                 | IPM | MEM | DOR |                                              |
| <b>Isolates with carbapenemases</b>  |                |                    |                                        |                                   |                                     |     |     |     |                                              |
| <b>Ambler class A carbapenemases</b> |                |                    |                                        |                                   |                                     |     |     |     |                                              |
| 0116                                 | AR Bank        | <i>C. freundii</i> | SAMN04014957                           | KPC-2                             | > 8                                 | 16  | > 8 | > 8 | 1, 2                                         |
| 0032                                 | AR Bank        | <i>E. cloacae</i>  | SAMN04014873                           | KPC-3; TEM-1                      | 8                                   | 4   | 4   | 2   | 1, 2                                         |
| 0050                                 | AR Bank        | <i>E. cloacae</i>  | SAMN04014891                           | KPC-4                             | 0.5                                 | 1   | 0.5 | 0.5 | 1                                            |
| 0053                                 | AR Bank        | <i>E. cloacae</i>  | SAMN04014894                           | KPC-3; TEM-1                      | > 8                                 | 8   | 8   | 4   | 1                                            |
| 0093                                 | AR Bank        | <i>E. cloacae</i>  | SAMN04014934                           | KPC-6                             | 4                                   | 4   | 4   | 2   | 1                                            |
| 0136                                 | AR Bank        | <i>E. cloacae</i>  | SAMN04014977                           | KPC-3                             | > 8                                 | 8   | > 8 | 8   | 1                                            |
| 0163                                 | AR Bank        | <i>E. cloacae</i>  | SAMN04015004                           | KPC-2; CTX-M-15;<br>ACT-7         | > 8                                 | 8   | 8   | 4   | 1, 2                                         |
| 0061                                 | AR Bank        | <i>E. coli</i>     | SAMN04014902                           | KPC-3; TEM-1                      | 8                                   | 4   | 4   | 4   | 1, 2                                         |
| 0104                                 | AR Bank        | <i>E. coli</i>     | SAMN04014945                           | KPC-4                             | 1                                   | 4   | 1   | 1   | 1, 2                                         |
| 0114                                 | AR Bank        | <i>E. coli</i>     | SAMN04014955                           | KPC-3                             | 8                                   | 4   | 4   | 4   | 1                                            |

|         |         |                      |              |       |      |      |      |     |      |
|---------|---------|----------------------|--------------|-------|------|------|------|-----|------|
| 0147    | AR Bank | <i>K. oxytoca</i>    | SAMN04014988 | KPC-3 | 0.5  | 4    | 1    | 0.5 | 1    |
| 0096    | AR Bank | <i>K. ozaenae</i>    | SAMN04014937 | KPC-3 | > 8  | > 64 | > 8  | > 8 | 1    |
| 0097    | AR Bank | <i>K. pneumoniae</i> | SAMN04014938 | KPC-3 | > 8  | 64   | > 8  | > 8 | 1    |
| 0098    | AR Bank | <i>K. pneumoniae</i> | SAMN04014939 | KPC-2 | > 8  | 16   | > 8  | 8   | 1    |
| 0112    | AR Bank | <i>K. pneumoniae</i> | NA           | KPC-3 | > 8  | 16   | > 8  | > 8 | 1    |
| 0113    | AR Bank | <i>K. pneumoniae</i> | SAMN04014954 | KPC-3 | > 8  | > 64 | > 8  | > 8 | 1    |
| 0115    | AR Bank | <i>K. pneumoniae</i> | SAMN04014956 | KPC-3 | > 8  | 8    | > 8  | > 8 | 1    |
| 0117    | AR Bank | <i>K. pneumoniae</i> | SAMN04014958 | KPC-3 | > 8  | 16   | > 8  | > 8 | 1    |
| 0120    | AR Bank | <i>K. pneumoniae</i> | SAMN04014961 | KPC-2 | > 16 | 16   | > 16 | NA  | 1    |
| 0125    | AR Bank | <i>K. pneumoniae</i> | SAMN04014966 | KPC-3 | > 16 | 16   | > 16 | NA  | 1    |
| 0126    | AR Bank | <i>K. pneumoniae</i> | SAMN04014967 | KPC-2 | 8    | 8    | 16   | NA  | 1    |
| 0129    | AR Bank | <i>K. pneumoniae</i> | SAMN04014970 | KPC-3 | > 16 | 8    | 16   | NA  | 1    |
| 1315075 | UCLA    | <i>K. pneumoniae</i> | NA           | KPC   | > 4  | > 8  | > 16 | NA  | 1    |
| 143671  | UCLA    | <i>K. pneumoniae</i> | NA           | KPC   | > 2  | 8    | 8    | NA  | 1    |
| 143681* | UCLA    | <i>K. pneumoniae</i> | NA           | KPC-3 | > 2  | > 8  | > 16 | NA  | 1    |
| 143682* | UCLA    | <i>K. pneumoniae</i> | NA           | KPC-3 | > 2  | 8    | 8    | NA  | 1    |
| 0144    | AR Bank | <i>K. ascorbata</i>  | SAMN04014985 | KPC-3 | 8    | 4    | 8    | 4   | 1    |
| 0133    | AR Bank | <i>M.morganii</i>    | SAMN04014974 | KPC-2 | 8    | 8    | 4    | 4   | 1, 2 |
| 0155    | AR Bank | <i>P. mirabilis</i>  | SAMN04014996 | KPC-6 | 2    | 16   | 2    | 2   | 1, 2 |

|                                      |         |                           |              |                             |      |      |      |     |      |
|--------------------------------------|---------|---------------------------|--------------|-----------------------------|------|------|------|-----|------|
| 0156                                 | AR Bank | <i>P. mirabilis</i>       | SAMN04014997 | KPC-2                       | 1    | 16   | 0.5  | 4   | 1    |
| 0134                                 | AR Bank | <i>R. ornithinolytica</i> | SAMN04014975 | KPC-3                       | 1    | 4    | 1    | 2   | 1, 2 |
| 0132                                 | AR Bank | <i>E. cloacae</i> complex | SAMN04014973 | NMC-A                       | 16   | > 32 | 16   | NA  | 1    |
| 0164                                 | AR Bank | <i>E. cloacae</i> complex | SAMN04015005 | NMC-A                       | > 8  | 32   | > 8  | > 8 | 1, 2 |
| 0091                                 | AR Bank | <i>S. marcescens</i>      | SAMN04014932 | SME-3                       | > 8  | > 64 | > 8  | > 8 | 1, 2 |
| 0099                                 | AR Bank | <i>S. marcescens</i>      | SAMN04014940 | SME-3                       | > 8  | > 64 | > 8  | > 8 | 1, 2 |
| 0121                                 | AR Bank | <i>S. marcescens</i>      | SAMN04014962 | SME-3                       | > 16 | > 32 | > 16 | NA  | 1    |
| 0122                                 | AR Bank | <i>S. marcescens</i>      | SAMN04014963 | SME-3                       | > 16 | > 32 | > 16 | NA  | 1    |
| 0123                                 | AR Bank | <i>S. marcescens</i>      | SAMN04014964 | SME-3                       | > 16 | > 32 | > 16 | NA  | 1    |
| 0124                                 | AR Bank | <i>S. marcescens</i>      | SAMN04014965 | SME-3                       | > 16 | > 32 | > 16 | NA  | 1    |
| 0130                                 | AR Bank | <i>S. marcescens</i>      | SAMN04014971 | SME-3                       | > 8  | > 32 | > 16 | NA  | 1    |
| 0131                                 | AR Bank | <i>S. marcescens</i>      | SAMN04014972 | SME-3                       | > 16 | > 32 | > 16 | NA  | 1    |
| <b>Ambler class B carbapenemases</b> |         |                           |              |                             |      |      |      |     |      |
| 0157                                 | AR Bank | <i>Citrobacter</i> sp.    | SAMN04014998 | NDM-1                       | > 8  | 16   | > 8  | > 8 | 1, 2 |
| 0038                                 | AR Bank | <i>E. cloacae</i>         | SAMN04014879 | NDM-1 --> None <sup>a</sup> | 4    | 32   | > 8  | > 8 | 1    |
| 0048                                 | AR Bank | <i>E. coli</i>            | SAMN04014889 | NDM-1                       | > 16 | 16   | > 16 | > 8 | 1    |
| 0055                                 | AR Bank | <i>E. coli</i>            | SAMN04014896 | NDM-1                       | > 8  | 8    | > 8  | > 8 | 1    |
| 0069                                 | AR Bank | <i>E. coli</i>            | SAMN04014910 | NDM-1                       | 4    | 8    | 8    | 8   | 1    |

|         |         |                      |              |                             |      |       |      |     |      |
|---------|---------|----------------------|--------------|-----------------------------|------|-------|------|-----|------|
| 0118    | AR Bank | <i>E. coli</i>       | SAMN04014959 | NDM-1                       | > 16 | 8     | > 16 | NA  | 1    |
| 0119    | AR Bank | <i>E. coli</i>       | SAMN04014960 | NDM-1                       | > 16 | 8     | > 16 | NA  | 1    |
| 0128    | AR Bank | <i>E. coli</i>       | SAMN04014969 | NDM-1                       | > 16 | 32    | > 16 | NA  | 1    |
| 0137    | AR Bank | <i>E. coli</i>       | SAMN04014978 | NDM-6                       | > 8  | 16    | > 8  | > 8 | 1, 2 |
| 0149    | AR Bank | <i>E. coli</i>       | SAMN04014990 | NDM-7                       | 8    | 8     | 8    | > 8 | 1    |
| 0150    | AR Bank | <i>E. coli</i>       | SAMN04014991 | NDM-5                       | > 8  | 16    | > 8  | > 8 | 1    |
| 0151    | AR Bank | <i>E. coli</i>       | SAMN04014992 | NDM-5                       | > 8  | 16    | > 8  | > 8 | 1    |
| 0162    | AR Bank | <i>E. coli</i>       | SAMN04015003 | NDM-7; CTX-M-15             | > 8  | 8     | > 8  | > 8 | 1, 2 |
| 1315335 | UCLA    | <i>E. coli</i>       | NA           | NDM-1                       | > 2  | > 8   | > 16 | NA  | 1    |
| 0041    | AR Bank | <i>K. pneumoniae</i> | SAMN04014882 | NDM-1                       | 4    | 8     | > 8  | > 8 | 1    |
| 0049    | AR Bank | <i>K. pneumoniae</i> | SAMN04014890 | NDM-1                       | 4    | 32    | > 8  | > 8 | 1    |
| 0068    | AR Bank | <i>K. pneumoniae</i> | SAMN04014909 | NDM-1; OXA-232 <sup>b</sup> | > 8  | 64    | > 8  | > 8 | 1    |
| 0153    | AR Bank | <i>K. pneumoniae</i> | SAMN04014994 | NDM-1; OXA-232 <sup>b</sup> | > 8  | 64    | > 8  | > 8 | 1    |
| 0106    | AR Bank | <i>K. pneumoniae</i> | SAMN04014947 | NDM-1                       | > 8  | > 64  | > 8  | > 8 | 1    |
| 0138    | AR Bank | <i>K. pneumoniae</i> | SAMN04014979 | NDM-7                       | > 8  | > 64  | > 8  | > 8 | 1    |
| 0139    | AR Bank | <i>K. pneumoniae</i> | SAMN04014980 | NDM-1 --> None <sup>a</sup> | > 8  | ≤ 0.5 | > 8  | > 8 | 1    |
| 0143    | AR Bank | <i>K. pneumoniae</i> | SAMN04014984 | NDM-1                       | > 8  | 32    | > 8  | > 8 | 1    |
| 0145    | AR Bank | <i>K. pneumoniae</i> | SAMN04014986 | NDM-1                       | > 8  | 16    | > 8  | > 8 | 1    |
| 0146    | AR Bank | <i>K. pneumoniae</i> | SAMN04014987 | NDM-1                       | > 8  | 8     | > 8  | > 8 | 1    |

|         |         |                                                    |              |        |     |     |      |     |      |
|---------|---------|----------------------------------------------------|--------------|--------|-----|-----|------|-----|------|
| 0148    | AR Bank | <i>K. pneumoniae</i>                               | SAMN04014989 | NDM-1  | > 8 | 16  | > 8  | > 8 | 1    |
| 0152    | AR Bank | <i>K. pneumoniae</i>                               | SAMN04014993 | NDM-1  | > 8 | 4   | > 8  | > 8 | 1    |
| 0158    | AR Bank | <i>K. pneumoniae</i>                               | SAMN04014999 | NDM-1  | > 8 | 16  | > 8  | > 8 | 1    |
| 143615  | UCLA    | <i>K. pneumoniae</i>                               | NA           | NDM-1  | > 2 | > 8 | > 16 | NA  | 1    |
| 0057    | AR Bank | <i>M. morgani</i>                                  | SAMN04014898 | NDM-1  | 2   | 8   | 4    | 8   | 1, 2 |
| 0159    | AR Bank | <i>P. mirabilis</i>                                | SAMN04015000 | NDM-1  | 4   | 32  | 4    | > 8 | 1, 2 |
| 0082    | AR Bank | <i>P. rettgeri</i>                                 | SAMN04014923 | NDM-1  | 8   | 32  | 8    | > 8 | 1, 2 |
| 0127    | AR Bank | <i>Salmonella enterica</i><br>serotype Senftenberg | SAMN04014968 | NDM-1  | > 8 | 4   | 8    | 8   | 1, 2 |
| 0154    | AR Bank | <i>E. cloacae</i>                                  | SAMN04014995 | VIM-1  | 2   | 4   | 2    | 4   | 1, 2 |
| 0040    | AR Bank | <i>K. pneumoniae</i>                               | SAMN04014881 | VIM-27 | 4   | 32  | > 8  | > 8 | 1    |
| 0046    | AR Bank | <i>K. pneumoniae</i>                               | SAMN04014887 | VIM-27 | > 8 | 64  | > 8  | > 8 | 1    |
| 0076    | AR Bank | <i>K. pneumoniae</i>                               | SAMN04014917 | VIM-1  | 1   | 4   | 4    | 4   | 1, 2 |
| 0135    | AR Bank | <i>K. pneumoniae</i>                               | SAMN04014976 | VIM-1  | > 4 | 8   | 8    | > 8 | 1    |
| 0161    | AR Bank | <i>E. aerogenes</i>                                | SAMN04015002 | IMP-4  | 2   | 2   | 2    | 2   | 1    |
| 1315298 | UCLA    | <i>K. pneumoniae</i>                               | NA           | IMP    | > 2 | 2   | 2    | NA  | 1    |
| 0034    | AR Bank | <i>K. pneumoniae</i>                               | SAMN04014875 | IMP-4  | 2   | 1   | 2    | 4   | 1    |
| 0080    | AR Bank | <i>K. pneumoniae</i>                               | SAMN04014921 | IMP-4  | 4   | 4   | 4    | 8   | 1, 2 |
| 143661  | UCLA    | <i>K. pneumoniae</i>                               | NA           | IMP    | > 2 | > 8 | 16   | NA  | 1    |

| <b>Ambler class D carbapenemases</b>                                   |         |                      |              |                                       |     |       |     |     |      |
|------------------------------------------------------------------------|---------|----------------------|--------------|---------------------------------------|-----|-------|-----|-----|------|
| 0074                                                                   | AR Bank | <i>E. aerogenes</i>  | SAMN04014915 | OXA-48                                | 2   | 4     | 2   | 2   | 1, 2 |
| 0051                                                                   | AR Bank | <i>K. ozaenae</i>    | SAMN04014892 | OXA-181                               | > 8 | 4     | 4   | 4   | 1, 2 |
| 0039                                                                   | AR Bank | <i>K. pneumoniae</i> | SAMN04014880 | OXA-181                               | 4   | 4     | 4   | 4   | 1, 2 |
| 0066                                                                   | AR Bank | <i>K. pneumoniae</i> | SAMN04014907 | OXA-232                               | > 8 | 4     | > 8 | > 8 | 1, 2 |
| 0075                                                                   | AR Bank | <i>K. pneumoniae</i> | SAMN04014916 | OXA-232                               | > 8 | 8     | > 8 | > 8 | 1, 2 |
| 0140                                                                   | AR Bank | <i>K. pneumoniae</i> | SAMN04014981 | OXA-181                               | > 8 | 2     | 4   | 4   | 1    |
| 0141                                                                   | AR Bank | <i>K. pneumoniae</i> | SAMN04014982 | OXA-181                               | > 8 | 2     | 4   | 4   | 1    |
| 0142                                                                   | AR Bank | <i>K. pneumoniae</i> | SAMN04014983 | OXA-181                               | 8   | 4     | 2   | 2   | 1    |
| 0160                                                                   | AR Bank | <i>K. pneumoniae</i> | SAMN04015001 | OXA-48                                | > 8 | 4     | 8   | 8   | 1, 2 |
| 143628                                                                 | UCLA    | <i>K. pneumoniae</i> | NA           | OXA-232                               | > 2 | 4     | 16  | NA  | 1    |
| 143658                                                                 | UCLA    | <i>K. pneumoniae</i> | NA           | OXA-232                               | > 2 | 2     | 16  | NA  | 1    |
| <b>Isolates without carbapenemases</b>                                 |         |                      |              |                                       |     |       |     |     |      |
| <b>Isolates that meet the 2015 CDC surveillance definition for CRE</b> |         |                      |              |                                       |     |       |     |     |      |
| 0007                                                                   | AR Bank | <i>E. aerogenes</i>  | SAMN04014848 | None identified                       | 2   | ≤ 0.5 | 1   | 1   | 2    |
| 0008                                                                   | AR Bank | <i>E. cloacae</i>    | SAMN04014849 | ACT-15; OmpF2 <sup>c</sup> ;<br>OmpC2 | > 8 | 1     | 2   | 2   | 2    |
| 0009                                                                   | AR Bank | <i>E. aerogenes</i>  | SAMN04014850 | Omp35; Omp36                          | > 8 | 1     | 2   | 2   | 2    |
| 0006                                                                   | AR Bank | <i>E. coli</i>       | SAMN04014847 | TEM-1; CMY-2;                         | > 8 | 16    | 8   | 4   | 2    |

|      |         |                      |              |                                                      |      |       |     |        |      |
|------|---------|----------------------|--------------|------------------------------------------------------|------|-------|-----|--------|------|
|      |         |                      |              | CTX-M-14; OmpC;<br>OmpF                              |      |       |     |        |      |
| 0085 | AR Bank | <i>E. coli</i>       | SAMN04014926 | CMY-2; OmpF                                          | 2    | ≤ 0.5 | 1   | ≤ 0.12 | 1, 2 |
| 0071 | AR Bank | <i>K. oxytoca</i>    | SAMN04014912 | OXY-2-8; OmpK36                                      | 8    | 1     | 8   | 2      | 1, 2 |
| 0042 | AR Bank | <i>K. pneumoniae</i> | SAMN04014883 | CTX-M-15; SHV-1;<br>TEM-1                            | > 8  | 1     | 2   | 2      | 1, 2 |
| 0043 | AR Bank | <i>K. pneumoniae</i> | SAMN04014884 | SHV-12                                               | > 8  | ≤ 0.5 | 2   | 1      | 1, 2 |
| 0044 | AR Bank | <i>K. pneumoniae</i> | SAMN04014885 | TEM-1; SHV-12;<br>CTX-M-15; OmpK35                   | > 8  | 1     | 4   | 2      | 1, 2 |
| 0047 | AR Bank | <i>K. pneumoniae</i> | SAMN04014888 | OmpK35; TEM-1                                        | > 16 | 2     | 4   | 4      | 1, 2 |
| 0079 | AR Bank | <i>K. pneumoniae</i> | SAMN04014920 | CTX-M-14; DHA-1;<br>TEM-1; SHV-11;<br>OmpK35; OmpK36 | > 8  | 16    | 8   | 8      | 1, 2 |
| 0107 | AR Bank | <i>K. pneumoniae</i> | SAMN04014948 | CTX-M-2; TEM-1;<br>SHV-83; OmpK35;<br>OmpK36         | > 8  | 8     | > 8 | > 8    | 1, 2 |
| 0109 | AR Bank | <i>K. pneumoniae</i> | SAMN04014950 | TEM-1; SHV-11;<br>CTX-M-15; OmpK36                   | > 8  | 2     | > 8 | 8      | 1, 2 |
| 0010 | AR Bank | <i>K. pneumoniae</i> | SAMN04014851 | CMY-94; SHV-1;                                       | > 8  | 4     | 1   | 1      | 2    |

|                                                                               |         |                      |              | OmpK35          |        |       |        |        |      |
|-------------------------------------------------------------------------------|---------|----------------------|--------------|-----------------|--------|-------|--------|--------|------|
| <b>Isolates that do not meet the 2015 CDC surveillance definition for CRE</b> |         |                      |              |                 |        |       |        |        |      |
| 0062                                                                          | AR Bank | <i>E. aerogenes</i>  | SAMN04014903 | None identified | 1      | ≤ 0.5 | ≤ 0.12 | ≤ 0.12 | 1, 2 |
| 0060                                                                          | AR Bank | <i>E. cloacae</i>    | SAMN04014901 | ACT-7           | 0.25   | ≤ 0.5 | ≤ 0.12 | ≤ 0.12 | 1, 2 |
| 0065                                                                          | AR Bank | <i>E. cloacae</i>    | SAMN04014906 | ACT-15          | 1      | ≤ 0.5 | ≤ 0.12 | ≤ 0.12 | 1, 2 |
| 0072                                                                          | AR Bank | <i>E. cloacae</i>    | SAMN04014913 | TEM-1           | 1      | ≤ 0.5 | ≤ 0.12 | ≤ 0.12 | 1, 2 |
| 0073                                                                          | AR Bank | <i>E. cloacae</i>    | SAMN04014914 | None identified | ≤ 0.12 | ≤ 0.5 | ≤ 0.12 | ≤ 0.12 | 1, 2 |
| 0018                                                                          | AR Bank | <i>E. aerogenes</i>  | SAMN04014859 | None identified | ≤ 0.12 | 1     | ≤ 0.12 | ≤ 0.12 | 2    |
| 0015                                                                          | AR Bank | <i>E. coli</i>       | SAMN04014856 | TEM-1; CTX-M-15 | 0.5    | ≤ 0.5 | ≤ 0.12 | ≤ 0.12 | 2    |
| 0017                                                                          | AR Bank | <i>E. coli</i>       | SAMN04014858 | None identified | ≤ 0.12 | ≤ 0.5 | ≤ 0.12 | 0.25   | 2    |
| 0019                                                                          | AR Bank | <i>E. coli</i>       | SAMN04014860 | TEM-1           | ≤ 0.12 | ≤ 0.5 | ≤ 0.12 | ≤ 0.12 | 2    |
| 0058                                                                          | AR Bank | <i>E. coli</i>       | SAMN04014899 | TEM-52          | 1      | ≤ 0.5 | 0.25   | 0.25   | 1, 2 |
| 0067                                                                          | AR Bank | <i>E. coli</i>       | SAMN04014908 | TEM-1           | ≤ 0.12 | ≤ 0.5 | ≤ 0.12 | ≤ 0.12 | 1, 2 |
| 0077                                                                          | AR Bank | <i>E. coli</i>       | SAMN04014918 | None identified | ≤ 0.12 | ≤ 0.5 | ≤ 0.12 | ≤ 0.12 | 1, 2 |
| 0081                                                                          | AR Bank | <i>E. coli</i>       | SAMN04014922 | CMY-2; TEM-1    | ≤ 0.12 | ≤ 0.5 | ≤ 0.12 | ≤ 0.12 | 1, 2 |
| 0084                                                                          | AR Bank | <i>E. coli</i>       | SAMN04014925 | TEM-1           | ≤ 0.12 | ≤ 0.5 | ≤ 0.12 | ≤ 0.12 | 1, 2 |
| 0086                                                                          | AR Bank | <i>E. coli</i>       | SAMN04014927 | CTX-M-14; TEM-1 | 1      | ≤ 0.5 | ≤ 0.12 | ≤ 0.12 | 1, 2 |
| 0089                                                                          | AR Bank | <i>E. coli</i>       | SAMN04014930 | CMY-2           | ≤ 0.12 | ≤ 0.5 | ≤ 0.12 | ≤ 0.12 | 1, 2 |
| 0087                                                                          | AR Bank | <i>K. pneumoniae</i> | SAMN04014928 | SHV-12          | 0.25   | ≤ 0.5 | ≤ 0.12 | ≤ 0.12 | 1, 2 |



|      |         |                      |              |        |        |       |        |        |      |
|------|---------|----------------------|--------------|--------|--------|-------|--------|--------|------|
| 0016 | AR Bank | <i>K. pneumoniae</i> | SAMN04014857 | LEN-16 | ≤ 0.12 | ≤ 0.5 | ≤ 0.12 | ≤ 0.12 | 2    |
| 0012 | AR Bank | <i>K. pneumoniae</i> | SAMN04014853 | SHV-12 | 0.5    | ≤ 0.5 | 0.25   | ≤ 0.12 | 2    |
| 0059 | AR Bank | <i>P. mirabilis</i>  | SAMN04014900 | TEM-1  | 0.5    | 4     | 1      | 0.5    | 1, 2 |

AR Bank, FDA-CDC Antimicrobial Resistance Isolate Bank; UCLA, UCLA Clinical Microbiology Laboratory; NCBI, National Center for Biotechnology Information, U.S. National Library of Medicine; MIC (minimum inhibitory concentration); ETP, ertapenem; IPM, imipenem; MEM, meropenem; DOR, doripenem; NA, not applicable; neg, negative; CRE, carbapenem-resistant *Enterobacteriaceae*

<sup>a</sup>Isolates were initially characterized as carrying *bla*<sub>NDM</sub>, but were found to be negative upon repeat *bla*<sub>NDM</sub> real-time PCR testing at the CDC, suggesting loss of the plasmid carrying the resistance gene.

<sup>b</sup>These two isolates carried both *bla*<sub>NDM-1</sub> (Ambler class B carbapenemase) and *bla*<sub>OXA-232</sub> (Ambler class D carbapenemase) genes.

<sup>c</sup>Reported truncated outer membrane porin genes (OMPs), due to the presence of premature stop codons, had a ≥ 80% sequence identity and 100% coverage threshold.
