# Supplementary material
Source: PubMed Central journal article supplement (PMC5527410)
Supplement: JCM.00193-17_zjm999095523s2.pdf [file JCM.00193-17_zjm999095523s2.pdf]

Table S2. Sensitivity and specificity (by laboratory, and average across all participating laboratories) of the mCIM in the stage 2, nine-laboratory study when setting the positive cut-off criterion at each possible zone diameter result

| mCIM zone size (mm) classified as positive | Site 1 <sup>a</sup> |                | Site 2          |                | Site 3          |                | Site 4          |                | Site 5          |                | Site 6          |                | Site 7 <sup>b</sup> |                | Site 8         |                 | Site 9          |                | All sites                |                          |                                  |
|--------------------------------------------|---------------------|----------------|-----------------|----------------|-----------------|----------------|-----------------|----------------|-----------------|----------------|-----------------|----------------|---------------------|----------------|----------------|-----------------|-----------------|----------------|--------------------------|--------------------------|----------------------------------|
|                                            | Sens. (%)           | Spec. (%)      | Sens. (%)       | Spec. (%)      | Sens. (%)       | Spec. (%)      | Sens. (%)       | Spec. (%)      | Sens. (%)       | Spec. (%)      | Sens. (%)       | Spec. (%)      | Sens. (%)           | Spec. (%)      | Sens. (%)      | Spec. (%)       | Sens. (%)       | Spec. (%)      | Mean of sens. values (%) | Mean of spec. values (%) | Sum of mean sens. and mean spec. |
| ≤ 6                                        | 23/26<br>(88.5)     | 34/34<br>(100) | 26/27<br>(96.3) | 34/34<br>(100) | 25/27<br>(92.6) | 34/34<br>(100) | 26/27<br>(96.3) | 34/34<br>(100) | 24/27<br>(88.8) | 34/34<br>(100) | 23/27<br>(85.2) | 34/34<br>(100) | 0/25<br>(0)         | 34/34<br>(100) | 27/27<br>(100) | 33/34<br>(97.1) | 26/27<br>(96.3) | 34/34<br>(100) | 82.7                     | 99.7                     | 182.4                            |
| ≤ 7                                        | 26/26<br>(100)      | 34/34<br>(100) | 26/27<br>(96.3) | 34/34<br>(100) | 25/27<br>(92.6) | 34/34<br>(100) | 26/27<br>(96.3) | 34/34<br>(100) | 24/27<br>(88.8) | 34/34<br>(100) | 24/27<br>(88.9) | 34/34<br>(100) | 25/25<br>(100)      | 34/34<br>(100) | 27/27<br>(100) | 33/34<br>(97.1) | 26/27<br>(96.3) | 34/34<br>(100) | 95.5                     | 99.7                     | 195.2                            |
| ≤ 8                                        | 26/26<br>(100)      | 34/34<br>(100) | 26/27<br>(96.3) | 34/34<br>(100) | 25/27<br>(92.6) | 34/34<br>(100) | 26/27<br>(96.3) | 34/34<br>(100) | 24/27<br>(88.8) | 34/34<br>(100) | 25/27<br>(92.6) | 34/34<br>(100) | 25/25<br>(100)      | 34/34<br>(100) | 27/27<br>(100) | 33/34<br>(97.1) | 26/27<br>(96.3) | 34/34<br>(100) | 95.9                     | 99.7                     | 195.6                            |
| ≤ 9                                        | 26/26<br>(100)      | 34/34<br>(100) | 26/27<br>(96.3) | 34/34<br>(100) | 25/27<br>(92.6) | 34/34<br>(100) | 26/27<br>(96.3) | 34/34<br>(100) | 25/27<br>(92.6) | 34/34<br>(100) | 25/27<br>(92.6) | 34/34<br>(100) | 25/25<br>(100)      | 34/34<br>(100) | 27/27<br>(100) | 33/34<br>(97.1) | 26/27<br>(96.3) | 34/34<br>(100) | 96.3                     | 99.7                     | 196.0                            |
| ≤ 10                                       | 26/26<br>(100)      | 34/34<br>(100) | 26/27<br>(96.3) | 34/34<br>(100) | 25/27<br>(92.6) | 34/34<br>(100) | 26/27<br>(96.3) | 34/34<br>(100) | 25/27<br>(92.6) | 34/34<br>(100) | 26/27<br>(96.3) | 34/34<br>(100) | 25/25<br>(100)      | 34/34<br>(100) | 27/27<br>(100) | 33/34<br>(97.1) | 26/27<br>(96.3) | 34/34<br>(100) | 96.7                     | 99.7                     | 196.4                            |
| ≤ 11                                       | 26/26<br>(100)      | 34/34<br>(100) | 26/27<br>(96.3) | 34/34<br>(100) | 25/27<br>(92.6) | 34/34<br>(100) | 26/27<br>(96.3) | 34/34<br>(100) | 25/27<br>(92.6) | 34/34<br>(100) | 26/27<br>(96.3) | 34/34<br>(100) | 25/25<br>(100)      | 34/34<br>(100) | 27/27<br>(100) | 33/34<br>(97.1) | 26/27<br>(96.3) | 34/34<br>(100) | 96.7                     | 99.7                     | 196.4                            |
| ≤ 12                                       | 26/26               | 34/34          | 26/27           | 34/34          | 25/27           | 34/34          | 26/27           | 34/34          | 25/27           | 34/34          | 26/27           | 34/34          | 25/25               | 34/34          | 27/27          | 33/34           | 26/27           | 34/34          | 96.7                     | 99.7                     | 196.4                            |

|      |       |        |        |        |        |        |        |        |        |        |        |        |       |        |       |        |         |        |      |      |       |
|------|-------|--------|--------|--------|--------|--------|--------|--------|--------|--------|--------|--------|-------|--------|-------|--------|---------|--------|------|------|-------|
|      | (100) | (100)  | (96.3) | (100)  | (92.6) | (100)  | (96.3) | (100)  | (92.6) | (100)  | (96.3) | (100)  | (100) | (100)  | (100) | (97.1) | (96.3)  | (100)  |      |      |       |
| ≤ 13 | 26/26 | 34/34  | 26/27  | 34/34  | 25/27  | 34/34  | 26/27  | 34/34  | 25/27  | 34/34  | 27/27  | 34/34  | 25/25 | 34/34  | 27/27 | 33/34  | 26/27   | 34/34  | 97.1 | 99.7 | 196.8 |
|      | (100) | (100)  | (96.3) | (100)  | (92.6) | (100)  | (96.3) | (100)  | (92.6) | (100)  | (100)  | (100)  | (100) | (100)  | (100) | (97.1) | (96.3)  | (100)  |      |      |       |
| ≤ 14 | 26/26 | 34/34  | 26/27  | 34/34  | 25/27  | 34/34  | 26/27  | 34/34  | 25/27  | 34/34  | 27/27  | 34/34  | 25/25 | 34/34  | 27/27 | 33/34  | 26/27   | 34/34  | 97.1 | 99.7 | 196.8 |
|      | (100) | (100)  | (96.3) | (100)  | (92.6) | (100)  | (96.3) | (100)  | (92.6) | (100)  | (100)  | (100)  | (100) | (100)  | (100) | (97.1) | (96.3)  | (100)  |      |      |       |
| ≤ 15 | 26/26 | 34/34  | 26/27  | 34/34  | 25/27  | 34/34  | 26/27  | 34/34  | 25/27  | 34/34  | 27/27  | 34/34  | 25/25 | 34/34  | 27/27 | 33/34  | 26/27   | 34/34  | 97.1 | 99.7 | 196.8 |
|      | (100) | (100)  | (96.3) | (100)  | (92.6) | (100)  | (96.3) | (100)  | (92.6) | (100)  | (100)  | (100)  | (100) | (100)  | (100) | (97.1) | (96.3)/ | (100)  |      |      |       |
| ≤ 16 | 26/26 | 34/34  | 26/27  | 34/34  | 25/27  | 34/34  | 26/27  | 34/34  | 25/27  | 34/34  | 27/27  | 34/34  | 25/25 | 34/34  | 27/27 | 33/34  | 26/27   | 34/34  | 97.1 | 99.7 | 196.8 |
|      | (100) | (100)  | (96.3) | (100)  | (92.6) | (100)  | (96.3) | (100)  | (92.6) | (100)  | (100)  | (100)  | (100) | (100)  | (100) | (97.1) | (96.3)  | (100)  |      |      |       |
| ≤ 17 | 26/26 | 34/34  | 26/27  | 34/34  | 25/27  | 34/34  | 26/27  | 34/34  | 25/27  | 34/34  | 27/27  | 34/34  | 25/25 | 34/34  | 27/27 | 33/34  | 26/27   | 34/34  | 97.1 | 99.7 | 196.8 |
|      | (100) | (100)  | (96.3) | (100)  | (92.6) | (100)  | (96.3) | (100)  | (92.6) | (100)  | (100)  | (100)  | (100) | (100)  | (100) | (97.1) | (96.3)  | (100)  |      |      |       |
| ≤ 18 | 26/26 | 34/34  | 26/27  | 34/34  | 26/27  | 33/34  | 26/27  | 34/34  | 25/27  | 34/34  | 27/27  | 34/34  | 25/25 | 34/34  | 27/27 | 33/34  | 26/27   | 34/34  | 97.5 | 99.4 | 196.9 |
|      | (100) | (100)  | (96.3) | (100)  | (96.3) | (97.1) | (96.3) | (100)  | (92.6) | (100)  | (100)  | (100)  | (100) | (100)  | (100) | (97.1) | (96.3)  | (100)  |      |      |       |
| ≤ 19 | 26/26 | 33/34  | 26/27  | 34/34  | 26/27  | 32/34  | 26/27  | 34/34  | 25/27  | 32/34  | 27/27  | 34/34  | 25/25 | 32/34  | 27/27 | 33/34  | 26/27   | 34/34  | 97.5 | 97.4 | 194.9 |
|      | (100) | (97.1) | (96.3) | (100)  | (96.3) | (94.1) | (96.3) | (100)  | (92.6) | (94.1) | (100)  | (100)  | (100) | (94.1) | (100) | (97.1) | (96.3)  | (100)  |      |      |       |
| ≤ 20 | 26/26 | 14/34  | 27/27  | 33/34  | 26/27  | 20/34  | 26/27  | 31/34  | 25/27  | 25/34  | 27/27  | 32/34  | 25/25 | 5/34   | 27/27 | 33/34  | 26/27   | 10/34  | 97.9 | 66.3 | 164.2 |
|      | (100) | (41.2) | (100)  | (97.1) | (96.3) | (58.8) | (96.3) | (91.2) | (92.6) | (73.5) | (100)  | (94.1) | (100) | (14.7) | (100) | (97.1) | (96.3)  | (29.4) |      |      |       |
| ≤ 21 | 26/26 | 3/34   | 27/27  | 33/34  | 26/27  | 10/34  | 26/27  | 29/34  | 26/27  | 12/34  | 27/27  | 24/34  | 25/25 | 1/34   | 27/27 | 32/34  | 27/27   | 3/34   | 98.8 | 48.0 | 146.8 |
|      | (100) | (8.8)  | (100)  | (97.1) | (96.3) | (29.4) | (96.3) | (85.3) | (96.3) | (35.3) | (100)  | (70.6) | (100) | (2.9)  | (100) | (94.1) | (100)   | (8.8)  |      |      |       |

|      |                |             |                |                 |                 |                |                 |                 |                |                |                |                 |                |             |                |                 |                |             |      |      |       |
|------|----------------|-------------|----------------|-----------------|-----------------|----------------|-----------------|-----------------|----------------|----------------|----------------|-----------------|----------------|-------------|----------------|-----------------|----------------|-------------|------|------|-------|
| ≤ 22 | 26/26<br>(100) | 0/34<br>(0) | 27/27<br>(100) | 30/34<br>(88.2) | 26/27<br>(96.3) | 4/34<br>(11.8) | 26/27<br>(96.3) | 25/34<br>(73.5) | 27/27<br>(100) | 5/34<br>(14.7) | 27/27<br>(100) | 10/34<br>(29.4) | 25/25<br>(100) | 0/34<br>(0) | 27/27<br>(100) | 32/34<br>(94.1) | 27/27<br>(100) | 0/34<br>(0) | 99.2 | 34.6 | 133.8 |
| ≤ 23 | 26/26<br>(100) | 0/34<br>(0) | 27/27<br>(100) | 15/34<br>(44.1) | 26/27<br>(96.3) | 2/34<br>(5.9)  | 26/27<br>(96.3) | 18/34<br>(52.9) | 27/27<br>(100) | 3/34<br>(8.8)  | 27/27<br>(100) | 2/34<br>(5.9)   | 25/25<br>(100) | 0/34<br>(0) | 27/27<br>(100) | 31/34<br>(91.2) | 27/27<br>(100) | 0/34<br>(0) | 99.2 | 23.2 | 122.4 |
| ≤ 24 | 26/26<br>(100) | 0/34<br>(0) | 27/27<br>(100) | 3/34<br>(8.8)   | 26/27<br>(96.3) | 1/34<br>(2.9)  | 27/27<br>(100)  | 14/34<br>(41.2) | 27/27<br>(100) | 1/34<br>(2.9)  | 27/27<br>(100) | 1/34<br>(2.9)   | 25/25<br>(100) | 0/34<br>(0) | 27/27<br>(100) | 27/34<br>(79.4) | 27/27<br>(100) | 0/34<br>(0) | 99.6 | 15.3 | 114.9 |
| ≤ 25 | 26/26<br>(100) | 0/34<br>(0) | 27/27<br>(100) | 1/34<br>(2.9)   | 26/27<br>(96.3) | 0/34<br>(0)    | 27/27<br>(100)  | 6/34<br>(17.6)  | 27/27<br>(100) | 1/34<br>(2.9)  | 27/27<br>(100) | 0/34<br>(0)     | 25/25<br>(100) | 0/34<br>(0) | 27/27<br>(100) | 19/34<br>(55.9) | 27/27<br>(100) | 0/34<br>(0) | 99.6 | 8.8  | 108.4 |
| ≤ 26 | 26/26<br>(100) | 0/34<br>(0) | 27/27<br>(100) | 0/34<br>(0)     | 26/27<br>(96.3) | 0/34<br>(0)    | 27/27<br>(100)  | 0/34<br>(0)     | 27/27<br>(100) | 1/34<br>(2.9)  | 27/27<br>(100) | 0/34<br>(0)     | 25/25<br>(100) | 0/34<br>(0) | 27/27<br>(100) | 13/34<br>(38.2) | 27/27<br>(100) | 0/34<br>(0) | 99.6 | 4.6  | 104.2 |
| ≤ 27 | 26/26<br>(100) | 0/34<br>(0) | 27/27<br>(100) | 0/34<br>(0)     | 26/27<br>(96.3) | 0/34<br>(0)    | 27/27<br>(100)  | 0/34<br>(0)     | 27/27<br>(100) | 1/34<br>(2.9)  | 27/27<br>(100) | 0/34<br>(0)     | 25/25<br>(100) | 0/34<br>(0) | 27/27<br>(100) | 9/34<br>(26.5)  | 27/27<br>(100) | 0/34<br>(0) | 99.6 | 3.3  | 102.9 |
| ≤ 28 | 26/26<br>(100) | 0/34<br>(0) | 27/27<br>(100) | 0/34<br>(0)     | 26/27<br>(96.3) | 0/34<br>(0)    | 27/27<br>(100)  | 0/34<br>(0)     | 27/27<br>(100) | 1/34<br>(2.9)  | 27/27<br>(100) | 0/34<br>(0)     | 25/25<br>(100) | 0/34<br>(0) | 27/27<br>(100) | 4/34<br>(11.8)  | 27/27<br>(100) | 0/34<br>(0) | 99.6 | 1.6  | 101.2 |
| ≤ 29 | 26/26<br>(100) | 0/34<br>(0) | 27/27<br>(100) | 0/34<br>(0)     | 26/27<br>(96.3) | 0/34<br>(0)    | 27/27<br>(100)  | 0/34<br>(0)     | 27/27<br>(100) | 0/34<br>(0)    | 27/27<br>(100) | 0/34<br>(0)     | 25/25<br>(100) | 0/34<br>(0) | 27/27<br>(100) | 0/34<br>(0)     | 27/27<br>(100) | 0/34<br>(0) | 99.6 | 0    | 99.6  |
| ≤ 30 | 26/26<br>(100) | 0/34<br>(0) | 27/27<br>(100) | 0/34<br>(0)     | 27/27<br>(100)  | 0/34<br>(0)    | 27/27<br>(100)  | 0/34<br>(0)     | 27/27<br>(100) | 0/34<br>(0)    | 27/27<br>(100) | 0/34<br>(0)     | 25/25<br>(100) | 0/34<br>(0) | 27/27<br>(100) | 0/34<br>(0)     | 27/27<br>(100) | 0/34<br>(0) | 100  | 0    | 100   |
| ≤ 31 | 26/26          | 0/34        | 27/27          | 0/34            | 27/27           | 0/34           | 27/27           | 0/34            | 27/27          | 0/34           | 27/27          | 0/34            | 25/25          | 0/34        | 27/27          | 0/34            | 27/27          | 0/34        | 100  | 0    | 100   |

|  |       |     |       |     |       |     |       |     |       |     |       |     |       |     |       |     |       |     |  |  |  |
|--|-------|-----|-------|-----|-------|-----|-------|-----|-------|-----|-------|-----|-------|-----|-------|-----|-------|-----|--|--|--|
|  | (100) | (0) | (100) | (0) | (100) | (0) | (100) | (0) | (100) | (0) | (100) | (0) | (100) | (0) | (100) | (0) | (100) | (0) |  |  |  |
|--|-------|-----|-------|-----|-------|-----|-------|-----|-------|-----|-------|-----|-------|-----|-------|-----|-------|-----|--|--|--|

mCIM, modified carbapenem inactivation method; sens., sensitivity; spec., specificity

<sup>a</sup> One strain that was mCIM-positive at Site 1 on the basis of multiple small bacterial colonies growing within the zone of inhibition was not included in this analysis. <sup>b</sup> Two strains that were mCIM-positive at Site 7 on the basis of multiple small bacterial colonies growing within the zone of inhibition were not included in this analysis.
